# Supplementary material for: RETURN OF VOLUNTARY MOTOR CONTRACTION AFTER COMPLETE SPINAL CORD INJURY: A PILOT HUMAN STUDY ON POLYLAMININ
Source: bioRxiv or medRxiv preprint supplement (doi:10.1101/2024.02.19.24301010), 2024-02-21

# PARTICIPANT 2

## INITIAL

|                      | Right side (RMS V) | Left side (RMS V) |
|----------------------|--------------------|-------------------|
| Biceps brachii       | 1.2967493          | NaN               |
| Triceps brachii      | 0.1589289          | NaN               |
| Quadriceps femoris   | NaN                | NaN               |
| Tibialis anterior    | 0.2226789          | NaN               |
| Gastrocnemius medial | 0.1954454          | NaN               |

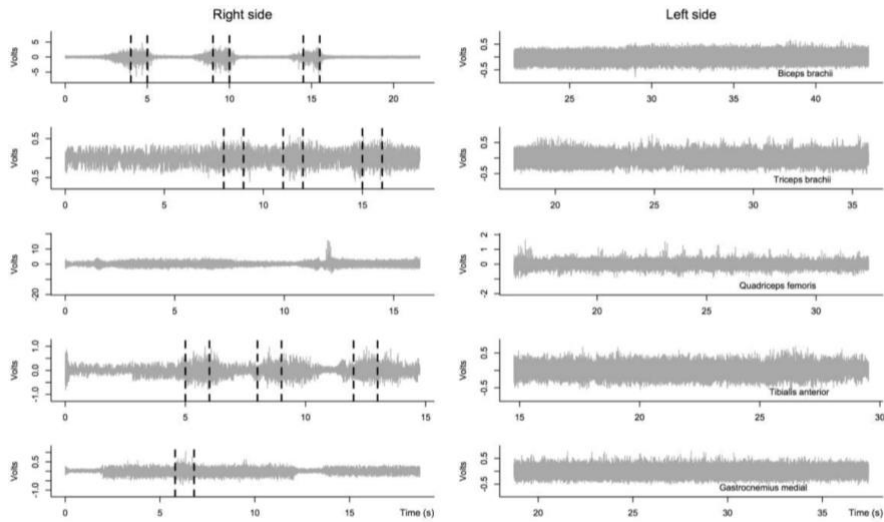

## FINAL

|                      | Right side (RMS V) | Left side (RMS V) |
|----------------------|--------------------|-------------------|
| Biceps brachii       | 0.16511261         | 0.13884371        |
| Triceps brachii      | 0.93459217         | 0.967289973       |
| Quadriceps femoris   | 0.16513402         | 0.033278241       |
| Tibialis anterior    | 0.02001822         | 0.006317445       |
| Gastrocnemius medial | 0.05740483         | 0.015812209       |

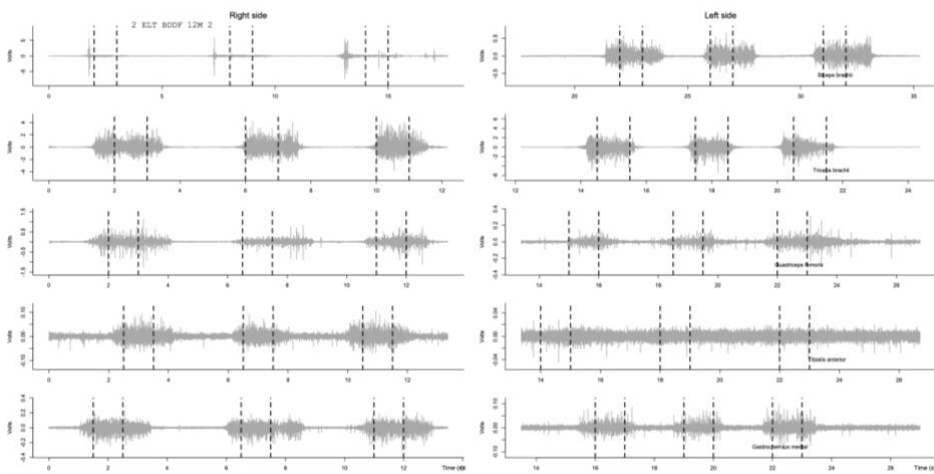

# PARTICIPANT 4

## INITIAL

|                      | Right side (RMS V) | Left side (RMS V) |
|----------------------|--------------------|-------------------|
| Biceps brachii       | NaN                | NaN               |
| Triceps brachii      | 0.2072178          | NaN               |
| Quadriceps femoris   | NaN                | NaN               |
| Tibialis anterior    | NaN                | NaN               |
| Gastrocnemius medial | NaN                | NaN               |

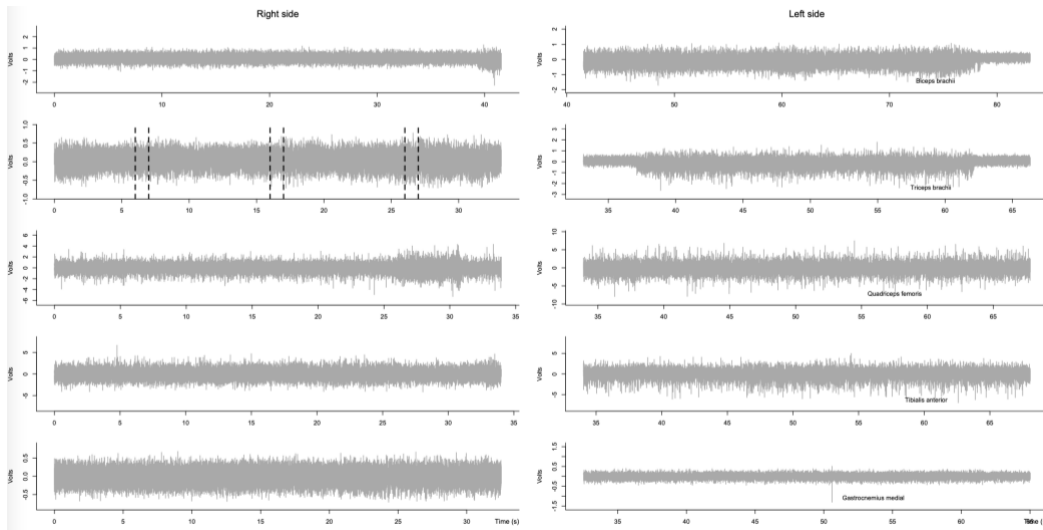

## FINAL

|                      | Right side (RMS V) | Left side (RMS V) |
|----------------------|--------------------|-------------------|
| Biceps brachii       | 0.1532704          | 0.3214382         |
| Triceps brachii      | 0.3773685          | 0.2684005         |
| Quadriceps femoris   | NaN                | NaN               |
| Tibialis anterior    | NaN                | NaN               |
| Gastrocnemius medial | NaN                | NaN               |

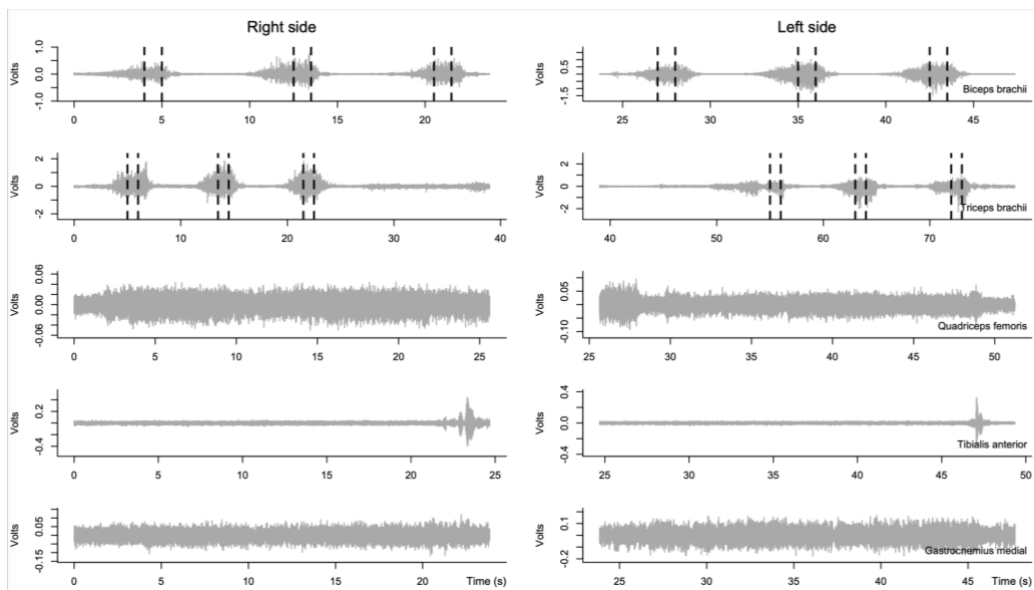

# PARTICIPANT 5

## INITIAL

|                      | Right side (RMS V) | Left side (RMS V) |
|----------------------|--------------------|-------------------|
| Biceps brachii       | 1.337749           | 2.218984          |
| Triceps brachii      | 1.795759           | 1.289479          |
| Quadriceps femoris   | NaN                | NaN               |
| Tibialis anterior    | NaN                | NaN               |
| Gastrocnemius medial | NaN                | NaN               |

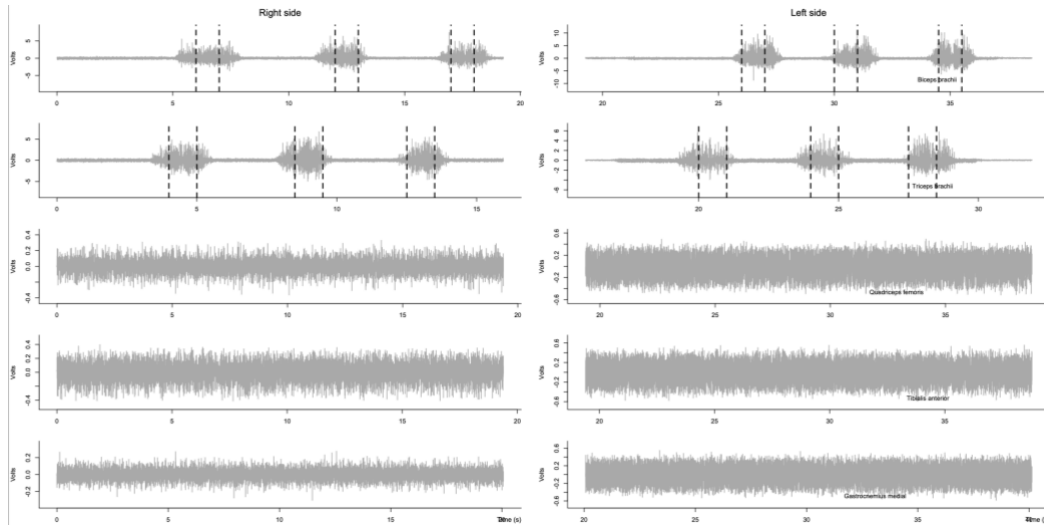

## FINAL

|                      | Right side (RMS V) | Left side (RMS V) |
|----------------------|--------------------|-------------------|
| Biceps brachii       | 0.9227677          | 0.8632993         |
| Triceps brachii      | 1.3548200          | 0.8365979         |
| Quadriceps femoris   | NaN                | NaN               |
| Tibialis anterior    | NaN                | NaN               |
| Gastrocnemius medial | NaN                | NaN               |

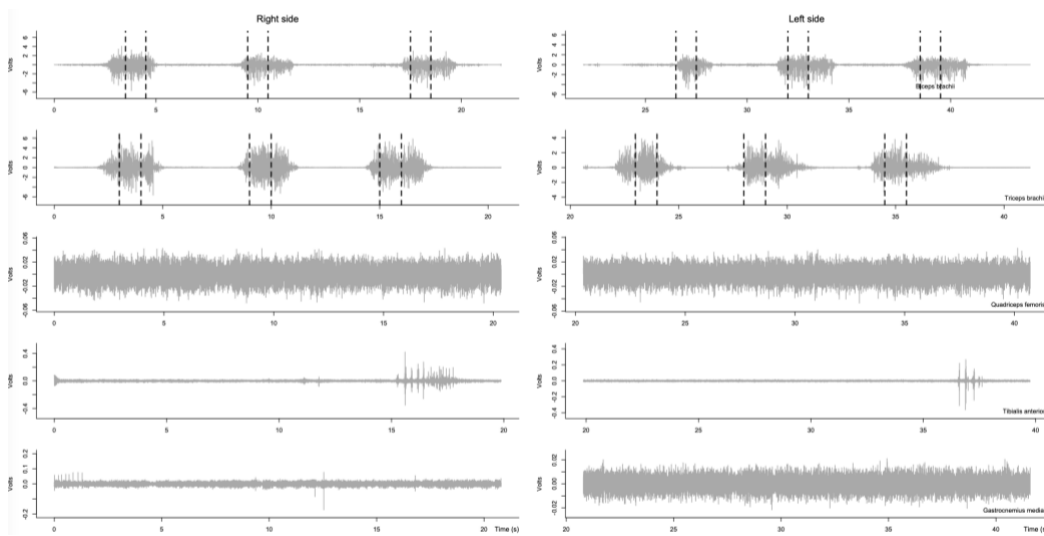

Supplement: Supplementary file [file media-2.pdf]
